# Supplementary material
Source: MDPI journal article supplement (https://www.mdpi.com/1424-2818/15/5/602)
Supplement: s1 [file s1]

## Supplementary Material

This is the supplementary material associated to the following scientific article:

Chaves, Ó.M.; Morales-Cerdas, V.; Calderón, J.; Azofeifa-Rojas, I.; Riba-Hernández, P.; Solano-Rojas, D.; Chaves, C.; Chacón-Madrigo, E.; Melin, A.D. Plant diversity in diet of Costa Rican Primates in contrasting habitats: a meta-analysis. *Diversity* **2023**

### Supplemental Data:

#### Collection Methods Used in Unpublished Studies

Chaves et al. (44) collected data on the diet of three habituated *Alouatta palliata* groups during a 16-month period (Jun 2021-Sept 2022), that included the study period of this meta-analysis (Table 1). In this investigation, ÓMC, VMC, and JC followed the groups 1-2/days per month from dawn to dusk. The behavioral records were collected with the aid of high-definition binoculars (Nikon® Prostaff 5, 10 x 52) via instantaneous scans every 15 min during a 5 min period and, during the inter-scan period, 5-min focal animal samples were collected when some individual was feeding. Riba-Hernández & Stoner [52] and Stoner & Riba-Hernández [55] used the same field methods described in Stoner [56], i.e. 2-min focal animal observations, to study the foraging behavior of three free-ranging groups of *A. palliata*. Finally, in the forest fragment of the Danta Corcovado Lodge, Guadalupe, Península de Osa (N8.62103, W83.47594), Solano-Rojas [74] collected data on the diet of a habituated free-ranging group of *Saimiri o. oerstedii* during a 8-mo period (Dec 2018-July 2019) distributed in 62 sampling days.

The fieldwork in the investigation of Chaves et al. [44] was performed with the approval of the Comité Institucional de Cuidado y Uso de Animales of the Universidad de Costa Rica (Ethic authorization #CICUA-071-2021), the Comisión Institucional de Biodiversidad (authorization #CBio-4-2021), and the Sistema Nacional de Áreas de Conservación, SINAC (permission # ACT-OR-DR-110-2021).

#### Comparison of alpha-diversity of species in diet using the Shannon-Wiener index

Using a standardized number of study groups per primate species (i.e. 5 study groups), the plant species richness in diet was 217 species for *Ateles geoffroyi* (Shannon index,  $H = 2.30$ ), 183 for *Saimiri*

*oerstedii* ( $H = 2.23$ ), 145 for *Cebus imitator* ( $H = 2.11$ ), and 66 species in *Alouatta palliata* ( $H = 1.80$ ). Consequently, the Shannon indices differed significantly among primate species (see Table S1).

**Table S1.** Results of the Shannon-Wiener indexes comparison for the plant dietary diversity for Costa Rican non-human primates using a rarified random number of monkey groups (i.e. 5 groups/primate species).

| Comparison <sup>1</sup>           | Shannon-Wiener index <sup>2</sup> | Hutcheson t-test | d.f. | P-value |
|-----------------------------------|-----------------------------------|------------------|------|---------|
| <i>Ateles</i> vs <i>Alouatta</i>  | 2.30 vs 1.80                      | 25.9             | 169  | <0.0001 |
| <i>Ateles</i> vs <i>Cebus</i>     | 2.30 vs 2.11                      | 10.0             | 418  | <0.0001 |
| <i>Ateles</i> vs <i>Saimiri</i>   | 2.30 vs 2.23                      | 4.1              | 472  | <0.0001 |
| <i>Saimiri</i> vs <i>Alouatta</i> | 2.23 vs 1.80                      | 21.7             | 181  | <0.0001 |
| <i>Saimiri</i> vs <i>Cebus</i>    | 2.23 vs 2.11                      | 6.1              | 412  | <0.0001 |
| <i>Cebus</i> vs <i>Alouatta</i>   | 2.11 vs 1.80                      | 14.6             | 215  | <0.0001 |

<sup>1</sup>The species with higher plant diversity in diet is enhanced in bold.

<sup>2</sup>The Shannon diversity index for each primate species is indicated

**Table S2.** Animal taxa reported in the diet of Costa Rican primates up to December 2022.

| Species/Mspp.                     | <i>A. palliata</i> | <i>C. imitator</i> | <i>S. oerstedii</i> | Reference                   |
|-----------------------------------|--------------------|--------------------|---------------------|-----------------------------|
| <b>VERTEBRATES</b>                |                    |                    |                     |                             |
| <b>Mammalia</b>                   |                    |                    |                     |                             |
| Primates                          |                    |                    |                     |                             |
| <i>Cebus imitator</i>             |                    | X                  |                     | Nishikawa et al. [118]      |
| <i>Saimiri oerstedii</i>          |                    | X                  |                     | Chaves [44]                 |
| Didelphidae                       |                    |                    |                     |                             |
| <i>Caluromys derbianus</i> (tail) |                    | X                  |                     | Chaves [44]                 |
| Procyonidae                       |                    |                    |                     |                             |
| <i>Nasua narica</i>               |                    | X                  |                     | Fedigan [119]               |
| Rodentia                          |                    |                    |                     |                             |
| <i>Sciurus variegatoides</i>      |                    | X                  |                     | Chaves [44], Fedigan [119]  |
| Chiroptera                        |                    |                    |                     |                             |
| <i>Artibeus watsoni</i>           |                    |                    | X                   | Boinski & Tim [120]         |
| bat Msp1                          |                    | X                  | X                   | Boinski [73], Fedigan [119] |

|                                  |  |   |   |                                  |
|----------------------------------|--|---|---|----------------------------------|
| <b>Aves</b>                      |  |   |   |                                  |
| bird Msp1                        |  | X | X | Boinski [73], Fedigan [119]      |
| various birds                    |  | X |   | Fedigan [119]                    |
| bird eggs                        |  |   |   | Fedigan [119]                    |
| <b>Reptilia</b>                  |  |   |   |                                  |
| snails                           |  | X | X | Boinski [73], Fedigan [119]      |
| lizards                          |  | X | X | Boinski [73], Fedigan [119]      |
| <i>Anolis biporcatus</i>         |  | X |   | Chaves [44]                      |
| <i>Ctenosaura similis</i> (tail) |  | X |   | Chaves [44]                      |
| <i>Iguana iguana</i> (tail)      |  | X |   | Chaves [44]                      |
| <b>Amphibia</b>                  |  |   |   |                                  |
| frogs Mspp                       |  | X | X | Boinski [73], Melin [121]        |
| <b>INVERTEBRATES</b>             |  |   |   |                                  |
| <b>Arachnida</b>                 |  |   |   |                                  |
| spider Msp1                      |  | X | X | Boinski [73], Melin [121]        |
| <b>Abranchiata</b>               |  |   |   |                                  |
| Lumbricidae                      |  |   | X | Boinski [73]                     |
| <b>Pulmonata</b>                 |  |   |   |                                  |
| flatworms                        |  |   | X | Boinski [73]                     |
| earthworms                       |  |   | X | Boinski [73]                     |
| <b>Insecta</b>                   |  |   |   |                                  |
| insect eggs                      |  |   | X | Boinski [73], Melin [121]        |
| Formicidae                       |  |   |   |                                  |
| <i>Pseudomyrmex</i> sp.          |  | X |   | McCabe [68]                      |
| <i>Pseudomyrmex flavicornis</i>  |  | X |   | Freeze [122]                     |
| Hemiptera                        |  | X | X | Boinski [73], Melin et al. [123] |
| Homoptera                        |  |   | X | Boinski [73]                     |
| Hymenoptera                      |  |   |   |                                  |
| ants, Boinski                    |  |   | X | Boinski [73], Melin et al. [123] |
| wasp, Boinski                    |  |   | X | Boinski [73], Melin et al. [123] |
| Blattodea                        |  |   |   |                                  |
| cockroach Msp1                   |  | X | X | Boinski [73], Melin et al. [123] |
| insect Msp12                     |  | X |   | Boinski [73]                     |
| insect Msp13                     |  | X |   | Boinski [73]                     |
| Coleoptera                       |  |   |   |                                  |
| beetles                          |  | X | X | Boinski [73], Melin et al. [123] |
| Diptera                          |  |   |   |                                  |
| flies                            |  |   | X | Boinski [73]                     |
| Lepidoptera                      |  |   |   |                                  |

|                                         |          |           |           |                                  |
|-----------------------------------------|----------|-----------|-----------|----------------------------------|
| Lepidoptera Msp1                        |          | X         | X         | McCabe [68]                      |
| Erebidae                                |          |           |           |                                  |
| <i>Coenipeta bibitrix</i> (caterpillar) | X        |           |           | Azofeifa [34]                    |
| Orthoptera                              |          |           |           |                                  |
| Orthoptera Msp1                         |          | X         | X         | Boinski [73], Melin et al. [123] |
| Tettigoniidae                           |          |           |           |                                  |
| katydid Msp1                            |          | X         | X         | Boinski [73], Melin et al. [123] |
| Termitidae                              |          |           |           |                                  |
| Termitidae                              |          | X         | X         | Boinski [73], Melin et al. [123] |
| <b>Vespidae</b>                         |          |           |           |                                  |
| <i>Polybia</i> sp                       |          |           | X         | Boinski & Tim [120]              |
| Insects no identified                   |          |           |           |                                  |
| insects (8 Mspp.)                       |          | X         |           | Melin et al. [70]                |
| insects (48 Mspp.)                      |          | X         |           | Mosdossy et al. [71]             |
| <b>Total = 13 species + 81 Mspp.</b>    | <b>1</b> | <b>71</b> | <b>23</b> |                                  |

**Table S3.** Shared and non-shared plant species in the diet of the four Costa Rican non-human primates in Tropical Dry Forests and Rainy Forests. For this analysis we only considered the studies  $\geq 6$  months in duration. *Ap* = *Alouatta palliata palliata*, *Ag* = *Ateles geoffroyi*, *Ci* = *Cebus imitator*, *So* = *Saimiri oerstedii*. The data are based in a standardized sample of 4 monkey groups in Tropical Dry Forests and 3 groups in Rainy Forests. \**S. oerstedii* do not occurs in Tropical Dry Forest.

| Tropical Dry Forests*            |           |           |           | Rainy Forests                    |           |           |           |           |
|----------------------------------|-----------|-----------|-----------|----------------------------------|-----------|-----------|-----------|-----------|
| Shared plant species in diet     |           |           |           | Shared plant species in diet     |           |           |           |           |
|                                  | <i>Ap</i> | <i>Ag</i> | <i>Ci</i> |                                  | <i>Ap</i> | <i>Ag</i> | <i>Ci</i> | <i>So</i> |
| <i>Ap</i>                        | 95        | 41        | 29        | <i>Ap</i>                        | 106       | 30        | 15        | 15        |
| <i>Ag</i>                        | 41        | 98        | 44        | <i>Ag</i>                        | 30        | 198       | 20        | 21        |
| <i>Ci</i>                        | 29        | 44        | 77        | <i>Ci</i>                        | 15        | 20        | 62        | 10        |
|                                  |           |           |           | <i>So</i>                        | 15        | 21        | 10        | 107       |
| Non-shared plant species in diet |           |           |           | Non-shared plant species in diet |           |           |           |           |
|                                  | <i>Ap</i> | <i>Ag</i> | <i>Ci</i> |                                  | <i>Ap</i> | <i>Ag</i> | <i>Ci</i> | <i>So</i> |
| <i>Ap</i>                        | 0         | 57        | 48        | <i>Ap</i>                        | 0         | 168       | 47        | 92        |
| <i>Ag</i>                        | 54        | 0         | 33        | <i>Ag</i>                        | 76        | 0         | 42        | 86        |

|           |    |    |   |           |    |     |    |    |
|-----------|----|----|---|-----------|----|-----|----|----|
| <i>Ci</i> | 66 | 54 | 0 | <i>Ci</i> | 91 | 178 | 0  | 97 |
|           |    |    |   | <i>So</i> | 91 | 177 | 52 | 0  |

**Table S4.** Results of the PERMANOVA assessing the influence seven predictors on the plant species assemblage in diet of Costa Rican primates. Significant effects are enhanced in bold.

| Predictor variable                       | d.f. | Sum of squares | <i>F</i> | R <sup>2</sup> | <i>p</i>     |
|------------------------------------------|------|----------------|----------|----------------|--------------|
| Primate species                          | 3    | 8.2            | 1.4      | 0.15           | <b>0.002</b> |
| Habitat type (i.e. TDF and Rainy Forest) | 1    | 3.5            | 1.8      | 0.06           | <b>0.002</b> |
| Province                                 | 2    | 5.3            | 1.4      | 0.09           | <b>0.045</b> |
| Group size                               | 1    | 2.6            | 1.4      | 0.05           | 0.052        |
| Study site                               | 10   | 23.5           | 1.2      | 0.42           | 0.075        |
| Primate species*HLZ                      | 1    | 2.3            | 1.2      | 0.04           | 0.14         |
| Sampling effort                          | 1    | 2.2            | 1.1      | 0.04           | 0.24         |
